# Supplementary material for: Energy, greenhouse gas, and water life cycle analysis of synthetic graphite anode production in the United States
Source: Royal Society of Chemistry journal article supplement (doi:10.1039/d5va00171d), 2025-01-01
Supplement: d5va00171d1.pdf [file d5va00171d1.pdf]

## Supplementary Information

### Energy, greenhouse gas, and water life cycle analysis of synthetic graphite anode production in the United States

Ramsharan Pandey, Ulises R. Gracida-Alvarez, Rakesh K. Iyer, Jarod C. Kelly\*

Energy Systems and Infrastructure Assessment Division, Argonne National Laboratory, 9700 South Cass Avenue, Lemont, IL, 60439 USA

\*Corresponding author: jckelly@anl.gov

#### S1. Life cycle inventory data of calcined petroleum coke

The life cycle inventory data for calcined petroleum coke (CPC) was obtained from Edwards et al.<sup>1</sup> This study provides detailed material and energy requirements, as well as output streams, for an industrial coke calciner operated by Rain Carbon. The data, based on the production of one kg of CPC, is presented in Table S1. It is important to note that the reported thermal energy was converted to natural gas consumption, assuming an energy efficiency of 85%.

Table S1. Material and energy requirements and output streams of CPC production<sup>1</sup>.

| Category                 | Item                 | Flow      |
|--------------------------|----------------------|-----------|
| Material inputs          | Green Petroleum Coke | 1.346 kg  |
|                          | Hydrated Lime        | 0.040 kg  |
|                          | Dedusting oil        | 0.002 kg  |
|                          | Process water        | 0.988 L   |
| Energy inputs            | Natural gas          | 0.014 kWh |
|                          | Electricity          | 0.101 kWh |
| Output streams           | CPC                  | 1.000 kg  |
|                          | Electricity          | 0.613 kWh |
|                          | Sulfated lime        | 0.063 kg  |
| Non-combustion emissions | CO <sub>2</sub>      | 0.723 kg  |
|                          | SO <sub>x</sub>      | 0.289 g   |

The data in Table S1 were further processed to account for allocation factors associated with the coproducts generated from the calcination process. First, the process water used is assumed to be discarded rather than recovered, and it is included in the water consumption estimates of the process. Also, according to Edwards et al.<sup>1</sup>, sulfated lime is supplied to a local brick factory to avoid landfilling. As such, sulfated lime was treated as a waste residue and excluded from the allocation. However, the electricity generated from the process was exported to the local grid and was therefore included in the allocation estimations. Market-value allocation was selected as the method for distributing impacts between CPC and electricity. The price of CPC was set at 413.3 USD/tonne, based on the average value from the range reported by Jinsun Carbon for CPC in the United States<sup>2</sup>. For electricity, a price of 112.7 USD/MWh was used, base on the average cost of commercial electricity in the United States between 2015 and 2024, as reported by the U.S. Energy Information administration<sup>3</sup>. Using these prices and the quantities of CPC and electricity produced, a market-value allocation factor for CPC of 0.857 was estimated. This allocation factor was applied to the material and energy inputs, as well as non-combustion emissions, to determine the life cycle inventory (LCI) data after allocation. These adjusted data was then implemented in R&D GREET 2023 to estimate

the corresponding environmental impacts. Degusting oil, which comprises less than 1% of the material inputs, was considered negligible and excluded from the LCI data. The final LCI data for CPC is presented in Table S2.

Table S2. Life cycle inventory data, after allocation, for one kg of CPC.

| Category                 | Item                 | Flow      |
|--------------------------|----------------------|-----------|
| Material inputs          | Green petroleum coke | 1.153 kg  |
|                          | Hydrated lime        | 0.034 kg  |
|                          | Water consumption    | 0.847 L   |
| Energy inputs            | Natural gas          | 0.012 kWh |
|                          | Electricity          | 0.086 kWh |
| Product                  | CPC                  | 1.000 kg  |
| Non-combustion emissions | CO <sub>2</sub>      | 0.620 kg  |
|                          | SO <sub>x</sub>      | 0.248 g   |

## S2. Life cycle inventory data of Synthetic graphite (SG) battery anode material (BAM)

Table S3 provides a summary of the material and energy inputs, along with the output streams, of the various stages of The SG BAM process.

Table S3. Material and energy requirements and outputs streams of the SG BAM production process

| Stage                       | Category        | Item                        | Flow   |     | Source                                                                  |
|-----------------------------|-----------------|-----------------------------|--------|-----|-------------------------------------------------------------------------|
| Milling                     | Material input  | Calcined coke               | 2.029  | kg  | Carrere et al. <sup>4</sup>                                             |
|                             | Energy inputs   | Natural gas                 | 0.334  | kWh | Carrere et al. <sup>4</sup>                                             |
|                             |                 | Electricity                 | 3.043  | kWh | Carrere et al. <sup>4</sup>                                             |
|                             | Output streams  | Coke fines                  | 0.406  | kg  | Carrere et al. <sup>4</sup>                                             |
|                             |                 | Ground coke                 | 1.623  | kg  | Carrere et al. <sup>4</sup>                                             |
| Crucible manufacturing      | Material input  | Graphite block              | 1.490  | kg  | Carrere et al. <sup>4</sup>                                             |
|                             | Output streams  | Crucible chips              | 1.057  | kg  | Data estimated from crucible yield from graphite block                  |
|                             |                 | Crucible                    | 0.433  | kg  | Data estimated from crucible yield from graphite block                  |
| Graphitization              | Material inputs | Ground coke                 | 1.623  | kg  | Carrere et al. <sup>4</sup>                                             |
|                             |                 | Metallurgical coke          | 0.791  | kg  | Carrere et al. <sup>4</sup>                                             |
|                             |                 | Crucible                    | 0.433  | kg  | Carrere et al. <sup>4</sup>                                             |
|                             | Energy input    | Electricity                 | 25.916 | kWh | Carrere et al. <sup>4</sup>                                             |
|                             | Output streams  | Packing media losses to air | 0.372  | kg  | Updated calculations based on discussions with Tokai COBEX <sup>5</sup> |
|                             |                 | Used packing media          | 0.419  | kg  | Carrere et al. <sup>4</sup>                                             |
|                             |                 | Used crucible               | 0.432  | kg  | Carrere et al. <sup>4</sup>                                             |
|                             |                 | Graphite powder             | 1.620  | kg  | Carrere et al. <sup>4</sup>                                             |
| Micronizing/Spheroidizing   | Material input  | Graphite powder             | 1.620  | kg  | Carrere et al. <sup>4</sup>                                             |
|                             | Energy inputs   | Natural gas                 | 0.267  | kWh | Carrere et al. <sup>4</sup>                                             |
|                             |                 | Electricity                 | 3.240  | kWh | Carrere et al. <sup>4</sup>                                             |
|                             | Output streams  | Graphite fines              | 0.667  | kg  | Carrere et al. <sup>4</sup>                                             |
|                             |                 | Micronized graphite powder  | 0.972  | kg  | Carrere et al. <sup>4</sup>                                             |
| Coating (Kneading)          | Material inputs | Micronized graphite powder  | 0.972  | kg  | Carrere et al. <sup>4</sup>                                             |
|                             |                 | Coal tar pitch (CTP)        | 0.051  | kg  | Carrere et al. <sup>4</sup>                                             |
|                             | Energy input    | Electricity                 | 0.170  | kWh | Carrere et al. <sup>4</sup>                                             |
|                             | Output stream   | CTP-coated BAM              | 1.023  | kg  | Carrere et al. <sup>4</sup>                                             |
| Coating (Thermal treatment) | Material input  | CTP-coated BAM              | 1.023  | kg  | Carrere et al. <sup>4</sup>                                             |
|                             | Energy inputs   | Natural gas                 | 2.149  | kWh | Carrere et al. <sup>4</sup>                                             |
|                             |                 | Electricity                 | 0.212  | kWh | Carrere et al. <sup>4</sup>                                             |
|                             | Output streams  | Coating losses to air       | 0.023  | kg  | Updated calculations based on discussions with Tokai COBEX <sup>5</sup> |
|                             |                 | Coated BAM                  | 1.000  | kg  | Carrere et al. <sup>4</sup>                                             |
| Packaging                   | Material inputs | Coated BAM                  | 1.000  | kg  | Carrere et al. <sup>4</sup>                                             |
|                             |                 | Cardboard                   | 0.020  | kg  | Carrere et al. <sup>4</sup>                                             |

|  |               |                   |       |     |                             |
|--|---------------|-------------------|-------|-----|-----------------------------|
|  |               | Pallet            | 0.020 | kg  | Carrere et al. <sup>4</sup> |
|  |               | Big bag           | 0.001 | kg  | Carrere et al. <sup>4</sup> |
|  | Energy inputs | Natural gas       | 0.031 | kWh | Carrere et al. <sup>4</sup> |
|  |               | Electricity       | 0.047 | kWh | Carrere et al. <sup>4</sup> |
|  | Output stream | Packed coated BAM | 1.000 | kg  | Carrere et al. <sup>4</sup> |

## References

- 1 L. Edwards, M. Hunt, P. Verma, P. Weyell and J. Koop, CB05-Sustainable CPC Production at the Vizag Calciner, *raincarbon.com*, 2020, 16–18.
- 2 Jinsun Carbon, Petroleum Coke Price Overview, [https://jinsuncarbon.com/petroleum-coke-price/#Latest\\_Price\\_Updates\\_for\\_Calcined\\_Petroleum\\_Coke](https://jinsuncarbon.com/petroleum-coke-price/#Latest_Price_Updates_for_Calcined_Petroleum_Coke), (accessed 27 August 2025).
- 3 US Energy Information Administration, Electric Power Monthly. Table 5.3. Average Price of Electricity to Ultimate Customers, [https://www.eia.gov/electricity/monthly/epm\\_table\\_grapher.php?t=epmt\\_5\\_3](https://www.eia.gov/electricity/monthly/epm_table_grapher.php?t=epmt_5_3), (accessed 27 August 2025).
- 4 T. Carrère, U. Khalid, M. Baumann, M. Bouzidi and B. Allard, Carbon footprint assessment of manufacturing of synthetic graphite battery anode material for electric mobility applications, *J Energy Storage*, 2024, **94**, 112356.
- 5 T. Carrère, *Personal communication with TOKAI COBEX*, 2024.
